# Supplementary material for: Combined in silico and 19F NMR analysis of 5-fluorouracil metabolism in yeast at low ATP conditions
Source: Oxford University Press journal article supplement (doi:10.1042/bsr20192847), 2019-11-19
Supplement: bsr-2019-2847_supp.pdf [file bsr-2019-2847_supp.pdf]

## Supplement

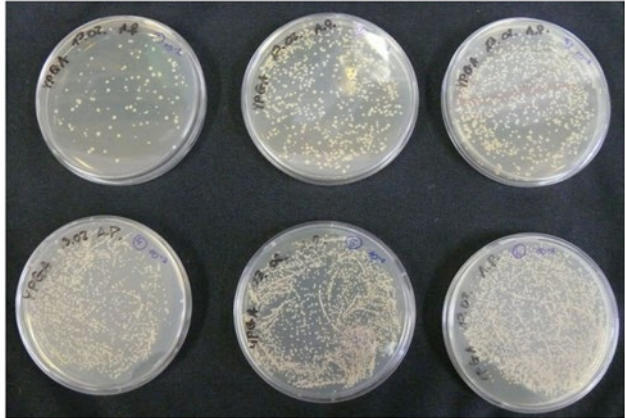

**Supp. Fig.1. *S. cerevisiae* growth.** The growth was monitored at 5-FU concentration varying in the range of 10mM - 0.1µM (from top-left to bottom-right, respectively).

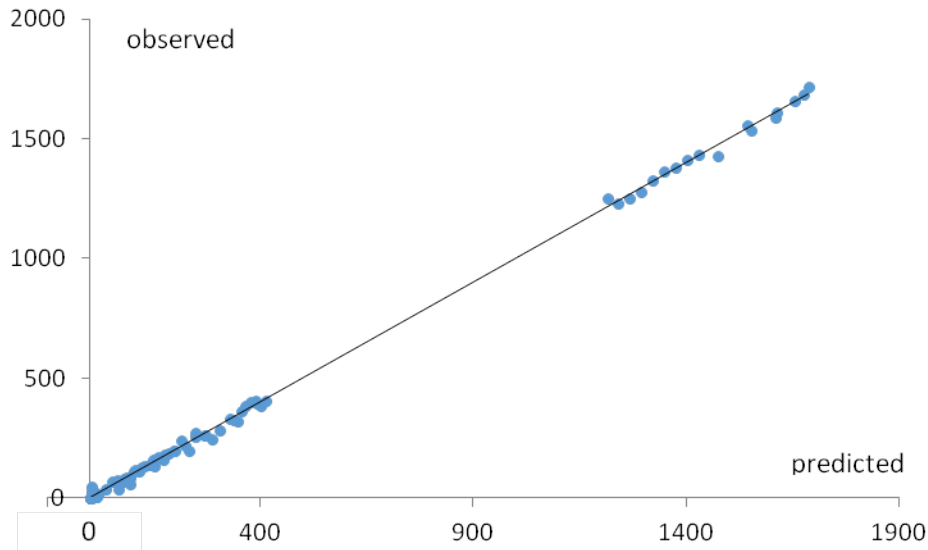

**Supp. Fig.2. The quality of fit.** Predicted vs observed values, a summary plot for all estimated parameters in an appropriate assumed units. A group of the kinetic rate separates from the concentration related parameters.

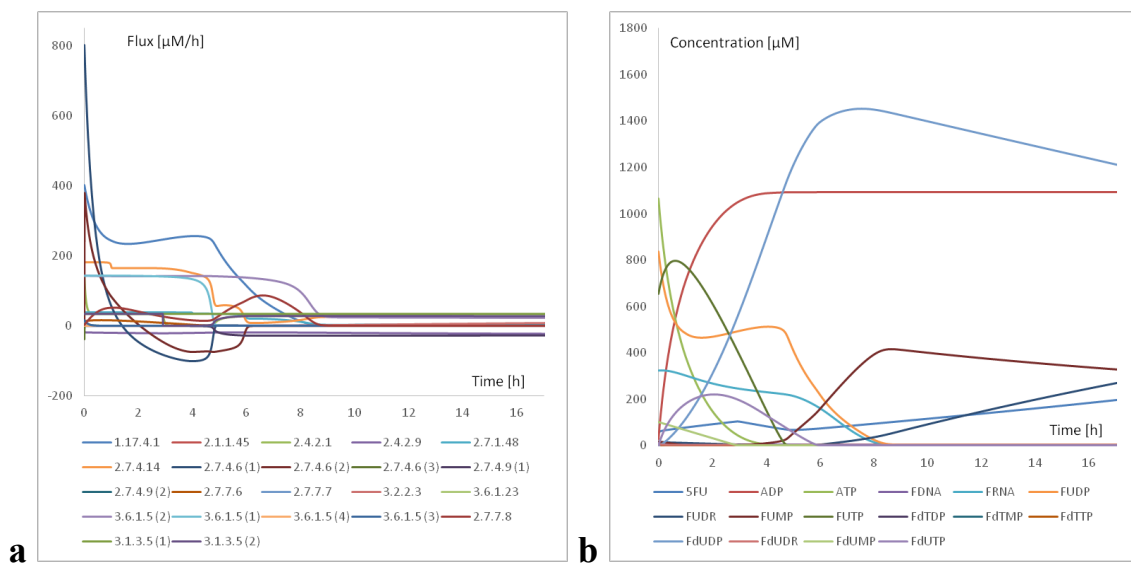

**Supp. Fig.3. Theoretical predictions of fitted model (time  $\leq 17$  h).** Kinetics of changes during the experiment, in: a- flux, b- concentration of species.



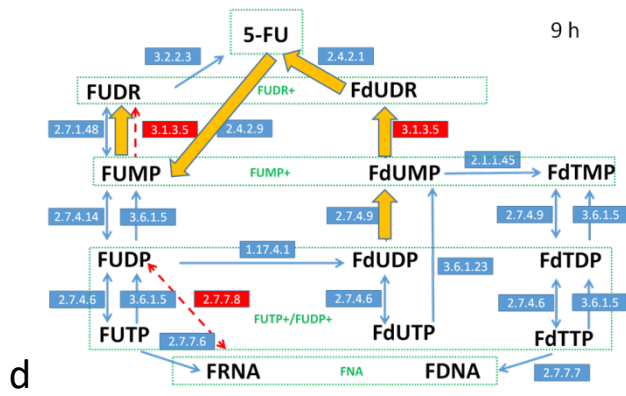

**Supp. Fig.4.** The main metabolic routes during experiment. The orange arrows indicate the dominating flux predicted by the fitted model, for the different time of the experiment: a - 0.01h, b- 3 h, c- 6 h, and d- 9 h.

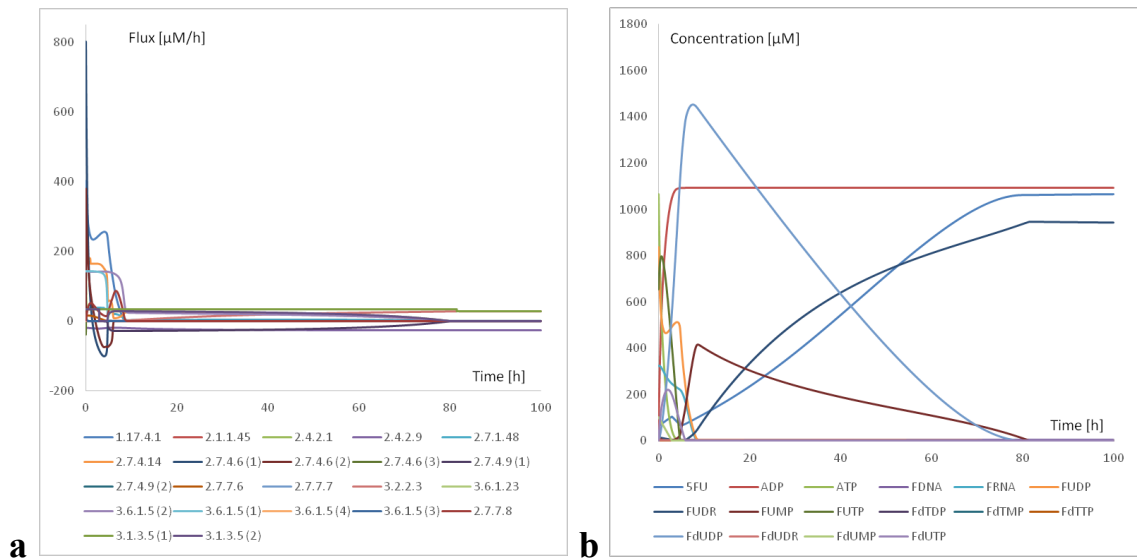

**Supp. Fig. 5. Theoretical predictions of fitted model ( $9\text{h} < \text{time} \leq 100\text{h}$ ). Kinetics of changes, in: a- flux, b- concentration of species.**

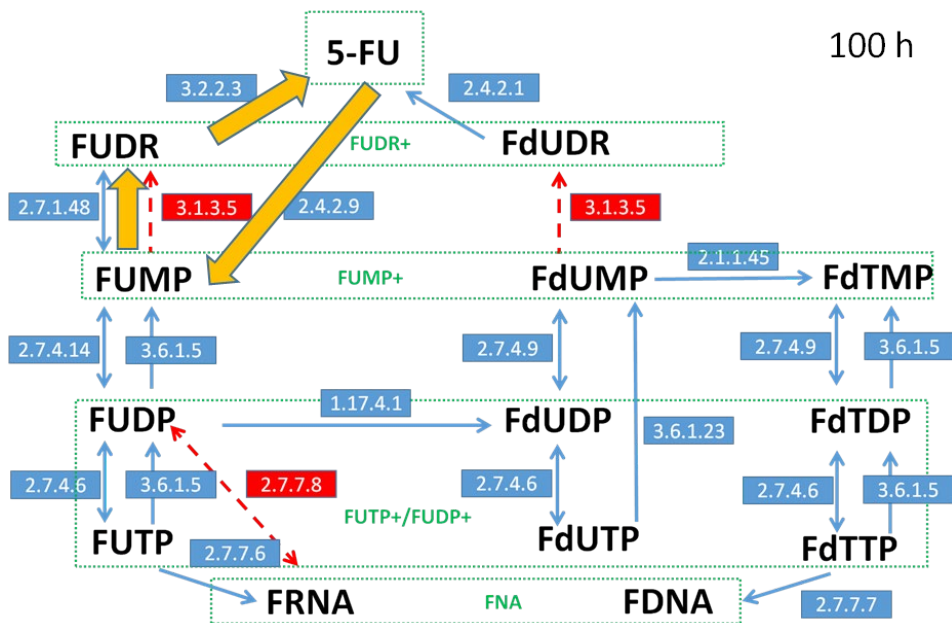

**Supp. Fig. 6. The main metabolic routes beyond the experiment. The orange arrows indicate the dominating flux predicted by the fitted model, time = 100 h.**

| <b>Supp. Tab.1. Metabolite initial concentration [<math>\mu\text{M}</math>]</b> |             |              |              |             |                 |
|---------------------------------------------------------------------------------|-------------|--------------|--------------|-------------|-----------------|
| <b>No.</b>                                                                      | <b>Name</b> | <b>Bfv</b>   | <b>Avg</b>   | <b>Stds</b> | <b>Dev/Stds</b> |
| 1.                                                                              | 5FU         | 5.5623E+01   | 5.5613E+01   | 1.3E-02     | 0.78            |
| 2.                                                                              | ADP         | 2.789E+01    | 2.829E+01    | 3.9E-01     | 1.05            |
| 3.                                                                              | ATP         | 1.065370E+03 | 1.065354E+03 | 2.4E-02     | 0.69            |
| 4.                                                                              | FUDR        | 1.3868E+01   | 1.3890E+01   | 1.2E-02     | 1.02            |
| 5.                                                                              | FdUDR       | 8.504E+00    | 8.505E+00    | 1.2E-02     | 0.11            |
| 6.                                                                              | FUMP        | 1.652E+01    | 1.664E+01    | 1.1E-01     | 1.13            |
| 7.                                                                              | FdUMP       | 9.9743E+01   | 9.9730E+01   | 1.9E-02     | 0.70            |
| 8.                                                                              | FdTMP       | 1.370E-01    | 1.399E-01    | 4.2E-03     | 0.69            |
| 9.                                                                              | FUDP        | 8.38078E+02  | 8.38025E+02  | 8.0E-02     | 0.67            |
| 10.                                                                             | FdUDP       | 8E-10*       | 2.8E-06      | 2.9E-06     | 0.99            |
| 11.                                                                             | FdTDP       | 1E-11*       | 6.7E-09      | 4.5E-09     | 1.51            |
| 12.                                                                             | FUTP        | 6.54891E+02  | 6.54869E+02  | 3.1E-02     | 0.71            |
| 13.                                                                             | FdUTP       | 5.6E-05      | 4.9E-05      | 1.2E-05     | 0.62            |
| 14.                                                                             | FdTTP       | 1.758E+00    | 1.743E+00    | 1.9E-02     | 0.83            |
| 15.                                                                             | FDNA        | 1E-05*       | 1.2E-03      | 1.3E-03     | 0.96            |
| 16.                                                                             | FRNA        | 3.21859E+02  | 3.21848E+02  | 2.9E-02     | 0.38            |

\* means no statistical significance
